# Supplementary material
Source: PubMed Central journal article supplement (PMC4052458)
Supplement: NIHMS258276-supplement-Supplementary_Data.pdf [file NIHMS258276-supplement-Supplementary_Data.pdf]

# Thank You

This PowerPoint document contains the images that you requested.

## **Copyright Notice**

All Online Service materials, including, without limitation, text, pictures, graphics and other files and the selection and arrangement thereof are copyrighted materials of Ovid or its licensors, all rights reserved. Except for the Authorized Use specified above, you may not copy, modify or distribute any of the Online Service materials. You may not "mirror" any material contained on this Online Service on any other server. Any unauthorized use of any material contained on this Online Service may violate copyright laws, trademark laws, the laws of privacy and publicity and communications regulations and statutes.

# Table 1

|             | <i>N</i> | %    |
|-------------|----------|------|
| Age (years) |          |      |
| Median      | 59       |      |
| Range       | 40–75    |      |
| Tumor site  |          |      |
| Oral cavity | 7        | 31.8 |
| Oropharynx  | 12       | 54.5 |
| Neck        | 2        | 9.2  |
| Sinus       | 1        | 4.5  |
| Stage       |          |      |
| I           | 0        | 0    |
| II          | 3        | 13.6 |
| III         | 0        | 0    |
| IV          | 19       | 86.4 |

**Anti-EMMPRIN antibody treatment of head and neck squamous cell carcinoma in an ex-vivo model.**

Dean, Nichole; Knowles, Joseph; Helman, Emily; Aldridge, Joszi; Carroll, William; Magnuson, Jeffery; Clemons, Lisa; Ziober, Barry; Rosenthal, Eben

Anti-Cancer Drugs. 21(9):861-867, October 2010.

DOI: 10.1097/CAD.0b013e32833d1a11

Table 1 Patient characteristics

# Table 2

| Patient ID | TNM classification | Stage | ATP level (% of control) | <i>P</i> |
|------------|--------------------|-------|--------------------------|----------|
| 1          | T4N2c              | IV    | 40                       | <0.001*  |
| 2          | T3N2b              | IV    | 47                       | 0.002*   |
| 3          | TxN2c              | IV    | 48                       | <0.001*  |
| 4          | TxN3               | IV    | 33                       | <0.001*  |
| 5          | T4N2b              | IV    | 78                       | 0.31     |
| 6          | T4N2c              | IV    | 27                       | <0.001*  |
| 7          | T4N2c              | IV    | 44                       | 0.004*   |
| 8          | T4N0               | IV    | 68                       | 0.09     |
| 9          | T2N2b              | IV    | 60                       | 0.15     |
| 10         | T4N2b              | IV    | 75                       | 0.42     |
| 11         | T2N0               | II    | 58                       | 0.12     |
| 12         | T4N2b              | IV    | 42                       | 0.01*    |
| 13         | T4N0               | IV    | 63                       | 0.04*    |
| 14         | T4N0               | IV    | 68                       | 0.26     |
| 15         | T4N0               | IV    | 32                       | 0.02*    |
| 16         | T4N2c              | IV    | 90                       | 0.79     |
| 17         | T2N2c              | IV    | 65                       | 0.21     |
| 18         | T4N2b              | IV    | 90                       | 0.11     |
| 19         | T2N0               | II    | 70                       | 0.37     |

TNM, tumor node metastasis.  
 \**P* value <0.05, statistically significant.

**Anti-EMMPRIN antibody treatment of head and neck squamous cell carcinoma in an ex-vivo model.**  
 Dean, Nichole; Knowles, Joseph; Helman, Emily; Aldridge, Joszi; Carroll, William; Magnuson, Jeffery; Clemons, Lisa; Ziober, Barry; Rosenthal, Eben

Anti-Cancer Drugs. 21(9):861-867, October 2010.  
 DOI: 10.1097/CAD.0b013e32833d1a11

Table 2 Head and neck cancer patient ATP levels after treatment with CNTO3899 (100 [mu]g/ml)TNM, tumor node metastasis.\**P* value <0.05, statistically significant.

Fig. 1

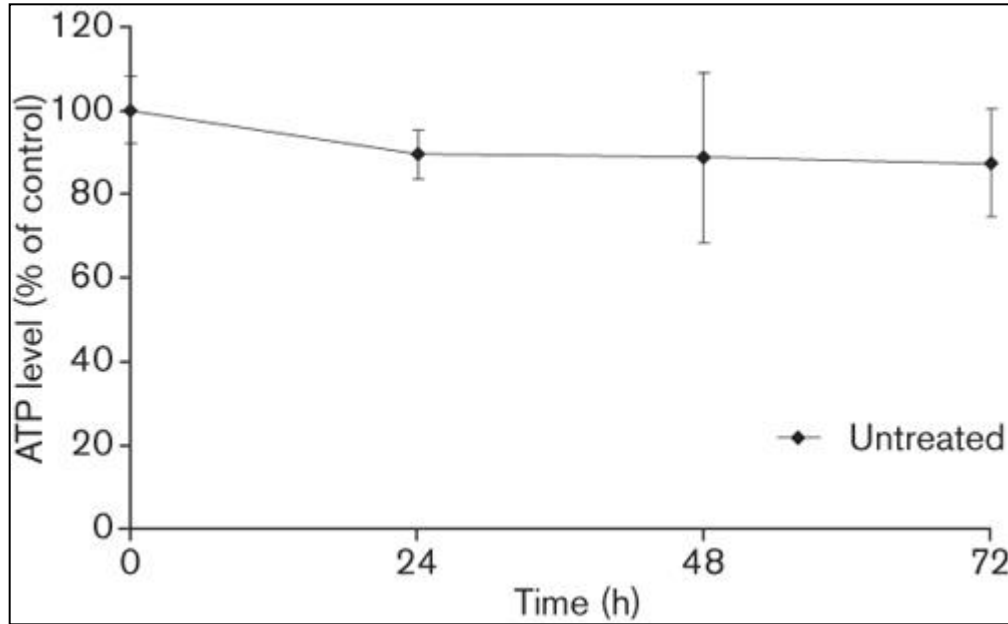

**Anti-EMMPRIN antibody treatment of head and neck squamous cell carcinoma in an ex-vivo model.**

Dean, Nichole; Knowles, Joseph; Helman, Emily; Aldridge, Joszi; Carroll, William; Magnuson, Jeffery; Clemons, Lisa; Ziober, Barry; Rosenthal, Eben

Anti-Cancer Drugs. 21(9):861-867, October 2010.

DOI: 10.1097/CAD.0b013e32833d1a11

Fig. 1 Viability of ex-vivo control tissue slices (n=6) at 24, 48, and 72 h compared to mean ATP level at time zero.

# Fig. 2

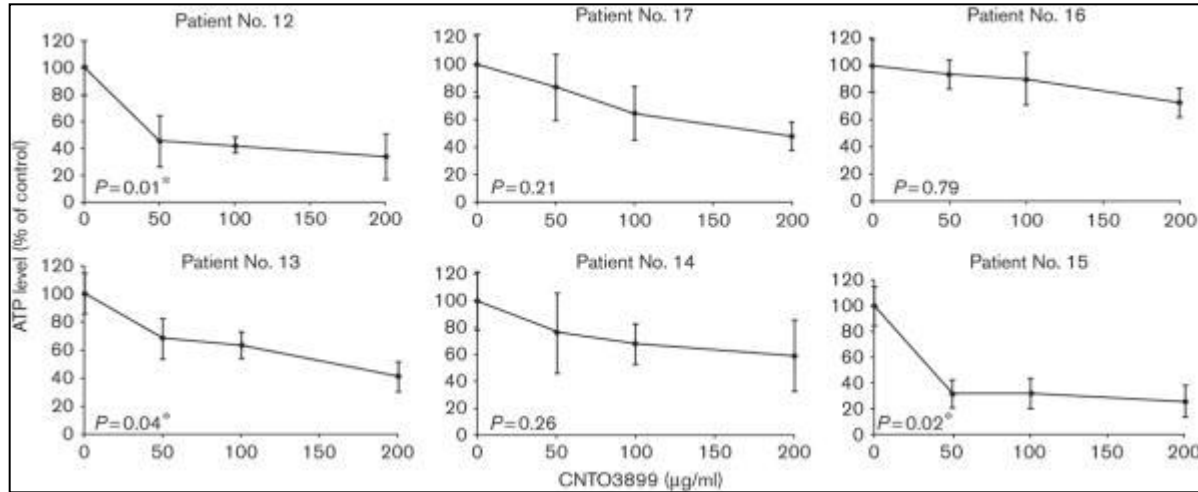

**Anti-EMMPRIN antibody treatment of head and neck squamous cell carcinoma in an ex-vivo model.**  
Dean, Nichole; Knowles, Joseph; Helman, Emily; Aldridge, Joszi; Carroll, William; Magnuson, Jeffery; Clemons, Lisa; Ziober, Barry; Rosenthal, Eben

Anti-Cancer Drugs. 21(9):861-867, October 2010.  
DOI: 10.1097/CAD.0b013e32833d1a11

Fig. 2 Tissue slice cytotoxicity assays in head and neck squamous cell carcinoma patient specimens cultured with varying concentrations of CNTO3899 (0, 50, 100, and 200 [µg/ml]). Six replicate slices were prepared per treatment group. A significant reduction in ATP levels was obtained with the treatment of 100 [µg/ml] anti-extracellular matrix metalloproteinase inducer monoclonal antibody in patients 12,13, and 15.

Fig. 3

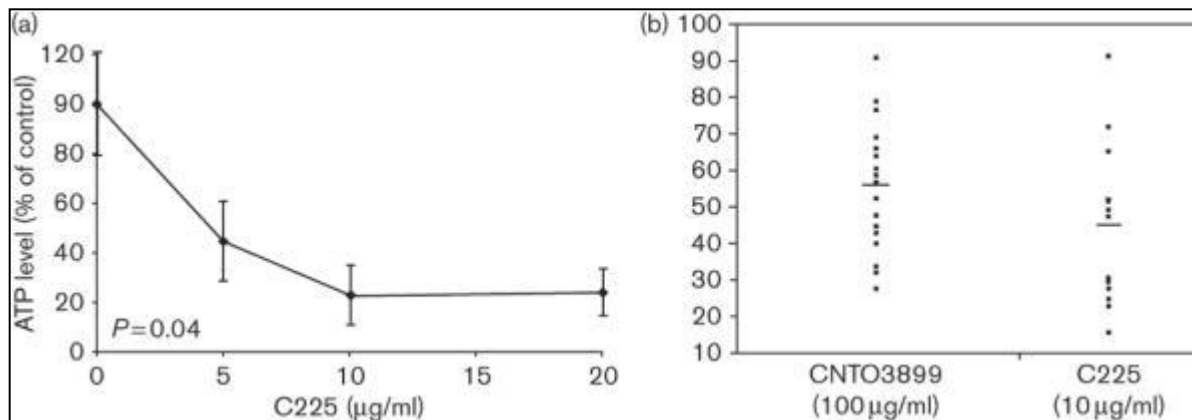

**Anti-EMMPRIN antibody treatment of head and neck squamous cell carcinoma in an ex-vivo model.**

Dean, Nichole; Knowles, Joseph; Helman, Emily; Aldridge, Joszi; Carroll, William; Magnuson, Jeffery; Clemons, Lisa; Ziober, Barry; Rosenthal, Eben

Anti-Cancer Drugs. 21(9):861-867, October 2010.

DOI: 10.1097/CAD.0b013e32833d1a11

Fig. 3 Comparison of anti-extracellular matrix metalloproteinase inducer antibody and cetuximab-induced cytotoxicity in head and neck squamous cell carcinoma patient specimens. (a) Cytotoxicity curve for head and neck cancer tissue slices (n=6 per treatment group) treated with varying concentrations of cetuximab (C225) (0, 5, 10, and 20 [µg/ml]). A significant reduction in ATP levels was obtained with 10 [µg/ml]. (b) Side-by-side comparison of CNTO3899 (100 [µg/ml]) and C225 (10 [µg/ml])-treated tissue specimens for all patients as a percentage of control. No significant difference was observed between mean ATP levels for anti-extracellular matrix metalloproteinase inducer (57%) and cetuximab (45%)-treated tumor specimens (P=0.13).

# Fig. 4

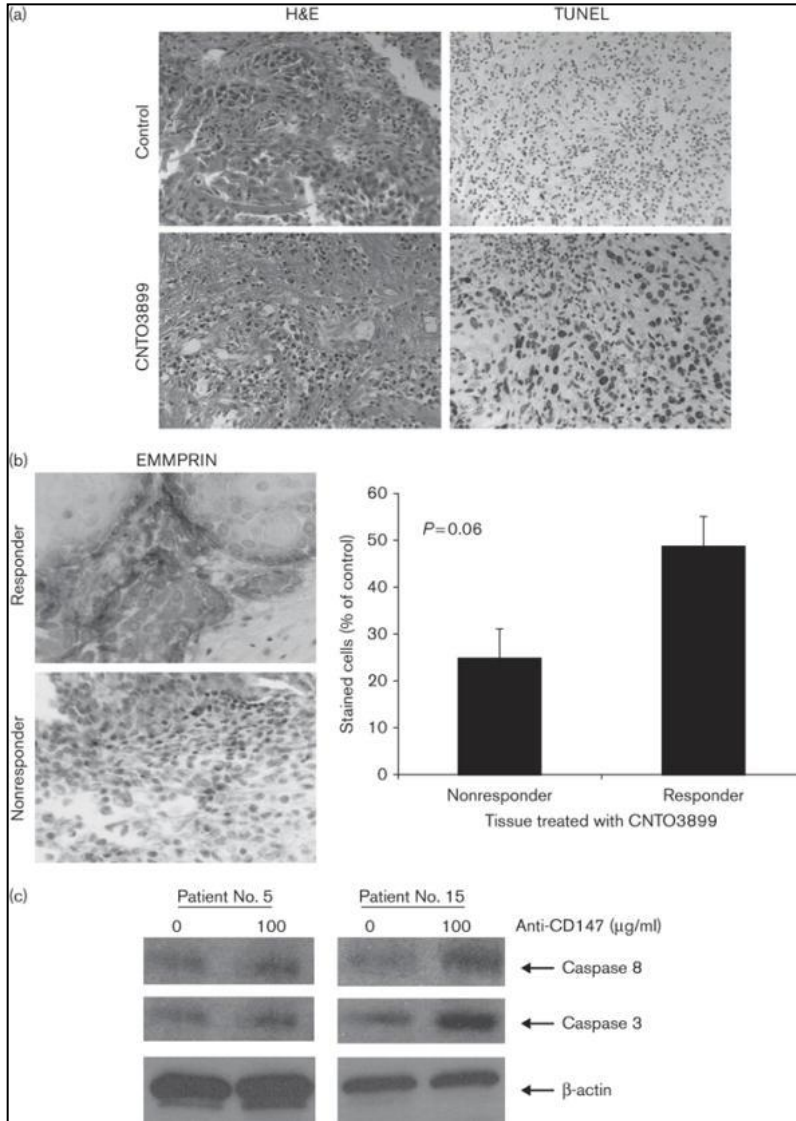

## Anti-EMMPRIN antibody treatment of head and neck squamous cell carcinoma in an ex-vivo model.

Dean, Nichole; Knowles, Joseph; Helman, Emily; Aldridge, Joszi; Carroll, William; Magnuson, Jeffery; Clemons, Lisa; Ziober, Barry; Rosenthal, Eben

Anti-Cancer Drugs. 21(9):861-867, October 2010.

DOI: 10.1097/CAD.0b013e32833d1a11

Fig. 4 Anti-extracellular matrix metalloproteinase inducer (EMMPRIN) monoclonal antibody induces caspase-mediated apoptosis; treatment response correlates with EMMPRIN expression. (a) Tissue specimens maintain intact tumor cells with surrounding vasculature and stroma on hematoxylin and eosin (H&E) staining. An increase in apoptosis in treated (100 [µ]g/ml CNTO3899) (77%) versus untreated slices (30%, PP=0.06) following treatment with anti-EMMPRIN monoclonal antibody. (c) CNTO3899 stimulates caspase-mediated apoptosis. Control and CNTO3899 treated tissue specimens were analyzed for caspase-3 and caspase-8 expression. An increase in caspase-3 expression was observed in both patients following treatment (PP<0.001).
